# Supplementary material for: Detecting Climate Driven Changes in Chlorophyll-a Using High Frequency Monitoring: The Impact of the 2019 European Heatwave in Three Contrasting Aquatic Systems
Source: MDPI journal article supplement (doi:10.3390/s21186242), 2021-09-17
Supplement: s1 [file s1]

# Detecting Climate Driven Changes in Chlorophyll-a Using High Frequency Monitoring: The Impact of the 2019 European Heatwave in Three Contrasting Aquatic Systems

Gary Free <sup>1,\*</sup>, Mariano Bresciani <sup>1</sup>, Monica Pinardi <sup>1</sup>, Claudia Giardino <sup>1</sup>, Krista Alikas <sup>2</sup>, Kersti Kangro <sup>2,3</sup>, Eva-Ingrid Rõõm <sup>3</sup>, Diana Vaičiūtė <sup>4</sup>, Martynas Bučas <sup>4</sup>, Edvinas Tiškus <sup>4</sup>, Annelies Hommersom <sup>5</sup>, Marnix Laanen <sup>5</sup> and Steef Peters <sup>5</sup>

## Supplementary material

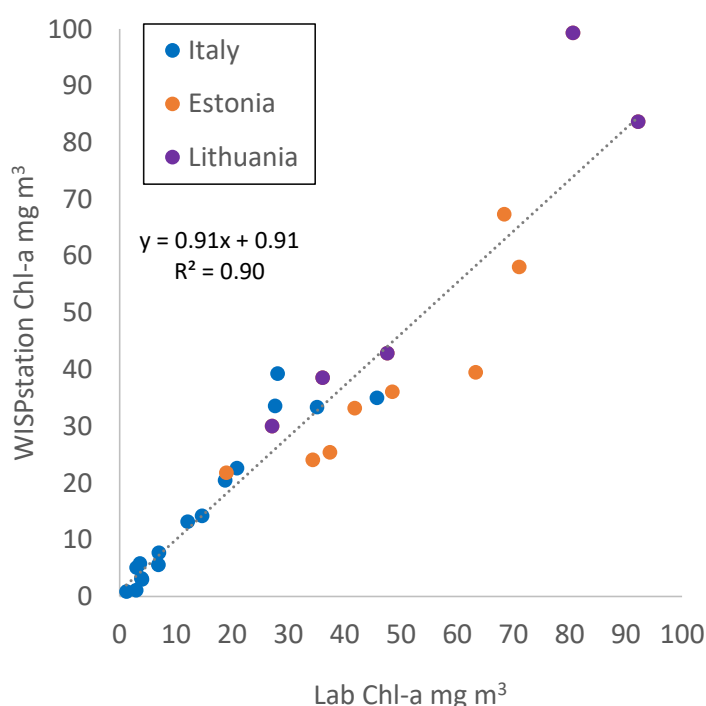

**Figure S1.** Results of a validation exercise carried out across the three countries for 29 sets of Chl-a estimates derived from the WISPstation and from laboratory measurements (further details in [63]).

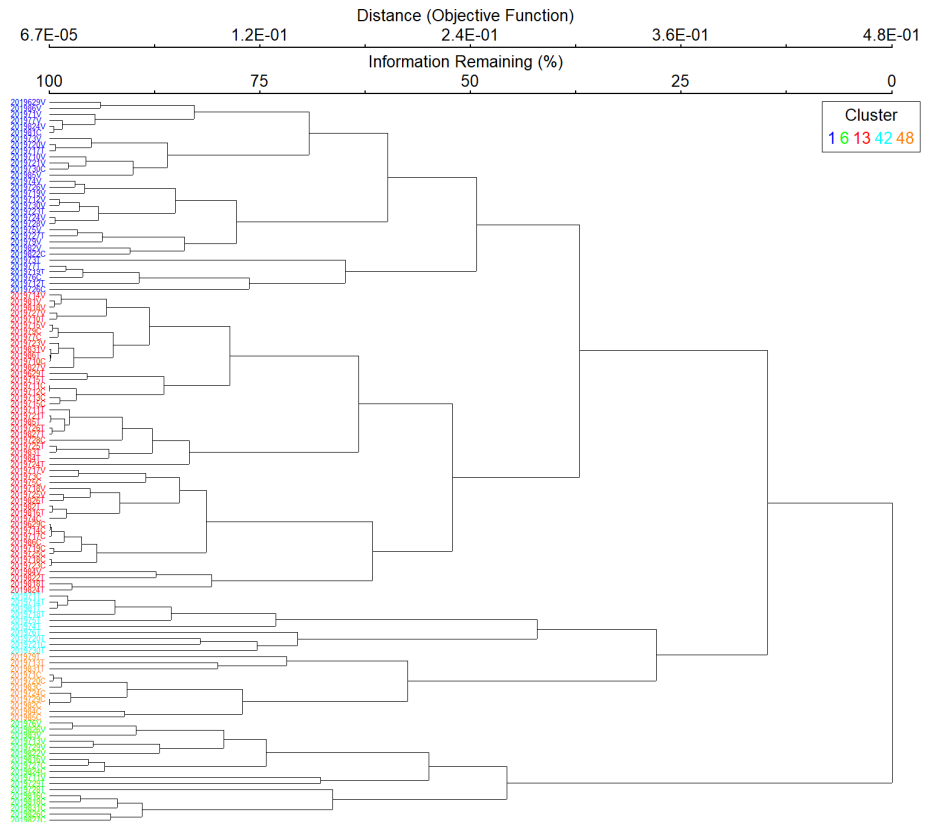

**Figure S2.** Results of cluster analysis on daily pattern of chlorophyll-a. Row code refers to date (YYMMDD) and lake: T = Trasemeno, V = Vörtsjärvi, C = Curonian Lagoon, coloured by cluster membership.
